# Supplementary material for: Photoredox Coupling of CO2 Reduction with Benzyl Alcohol Oxidation over Ternary Metal Chalcogenides (ZnmIn2S3+m, m = 1–5) with Regulable Products Selectivity
Source: MDPI journal article supplement (doi:10.3390/molecules28186553), 2023-09-10
Supplement: s1 [file s1]

## Supporting Information for

### **Photoredox coupling of CO<sub>2</sub> reduction with benzyl alcohol oxidation over ternary metal chalcogenides (Zn<sub>m</sub>In<sub>2</sub>S<sub>3+m</sub>, m = 1–5) with regulable products selectivity**

Zisheng Du<sup>1</sup>, Kexin Gong<sup>2</sup>, Zhiruo Yu<sup>1</sup>, Yang Yang<sup>\*1,2,3</sup>, Peixian Wang<sup>4</sup>, Xiuzhen Zheng<sup>1</sup>, Zhongliao Wang<sup>1</sup>, Sujuan Zhang<sup>1</sup>, Shifu Chen<sup>1,2</sup>, and Sugang Meng<sup>\*1,2,4</sup>

<sup>1</sup> Key Laboratory of Green and Precise Synthetic Chemistry and applications, Ministry of Education, College of Chemistry and Materials Science, Huaibei Normal University, Huaibei, 235000, P. R. China.

<sup>2</sup> Key Laboratory of Pollutant Sensitive Materials and Environmental Remediation, Key Lab of Clean Energy and Green Circulation, Huaibei Normal University, Huaibei 235000, P. R. China.

<sup>3</sup> Shanghai Key Laboratory of Atmospheric Particle Pollution and Prevention (LAP<sup>3</sup>), Fudan University, Shanghai 200438, P. R. China.

<sup>4</sup> State Key Laboratory Incubation Base for Green Processing of Chemical Engineering, School of Chemistry and Chemical Engineering, Shihezi, 832003, P. R. China.

\* Corresponding authors, E-mails: [yangy@chnu.edu.cn](mailto:yangy@chnu.edu.cn) (Y. Yang); [mengsugang@126.com](mailto:mengsugang@126.com) (S. Meng, Tel: +86-0561-3802235).

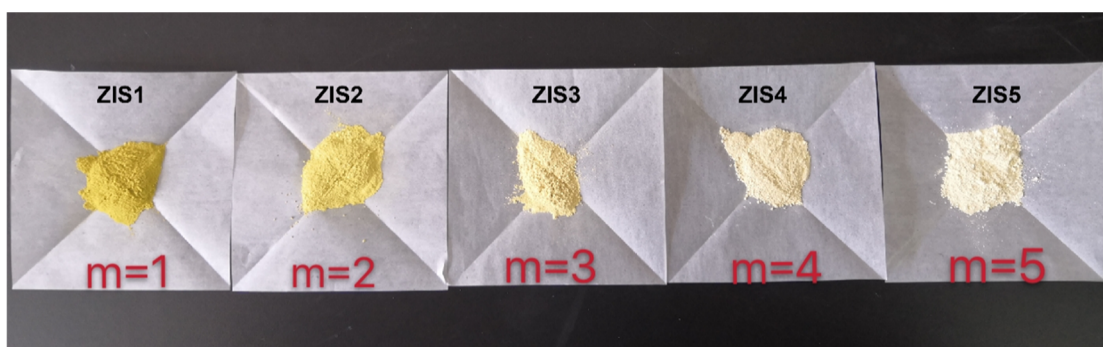

**Figure S1.** Macro images of ZIS samples.

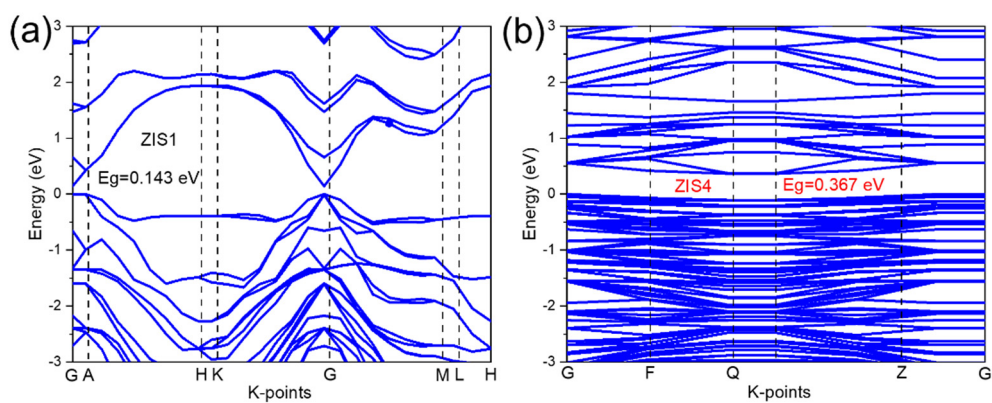

**Figure S2.** The band gap of (a) ZIS1 and (b) ZIS4 by DFT calculation.

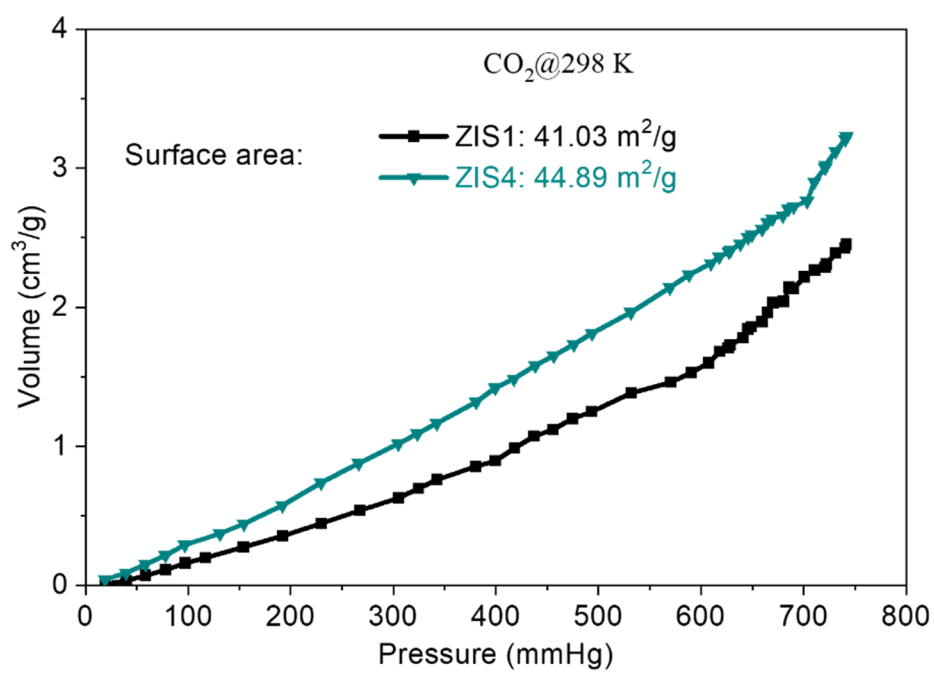

**Figure S3.** CO<sub>2</sub> adsorption-desorption isotherms of ZIS1 and ZIS4 samples.

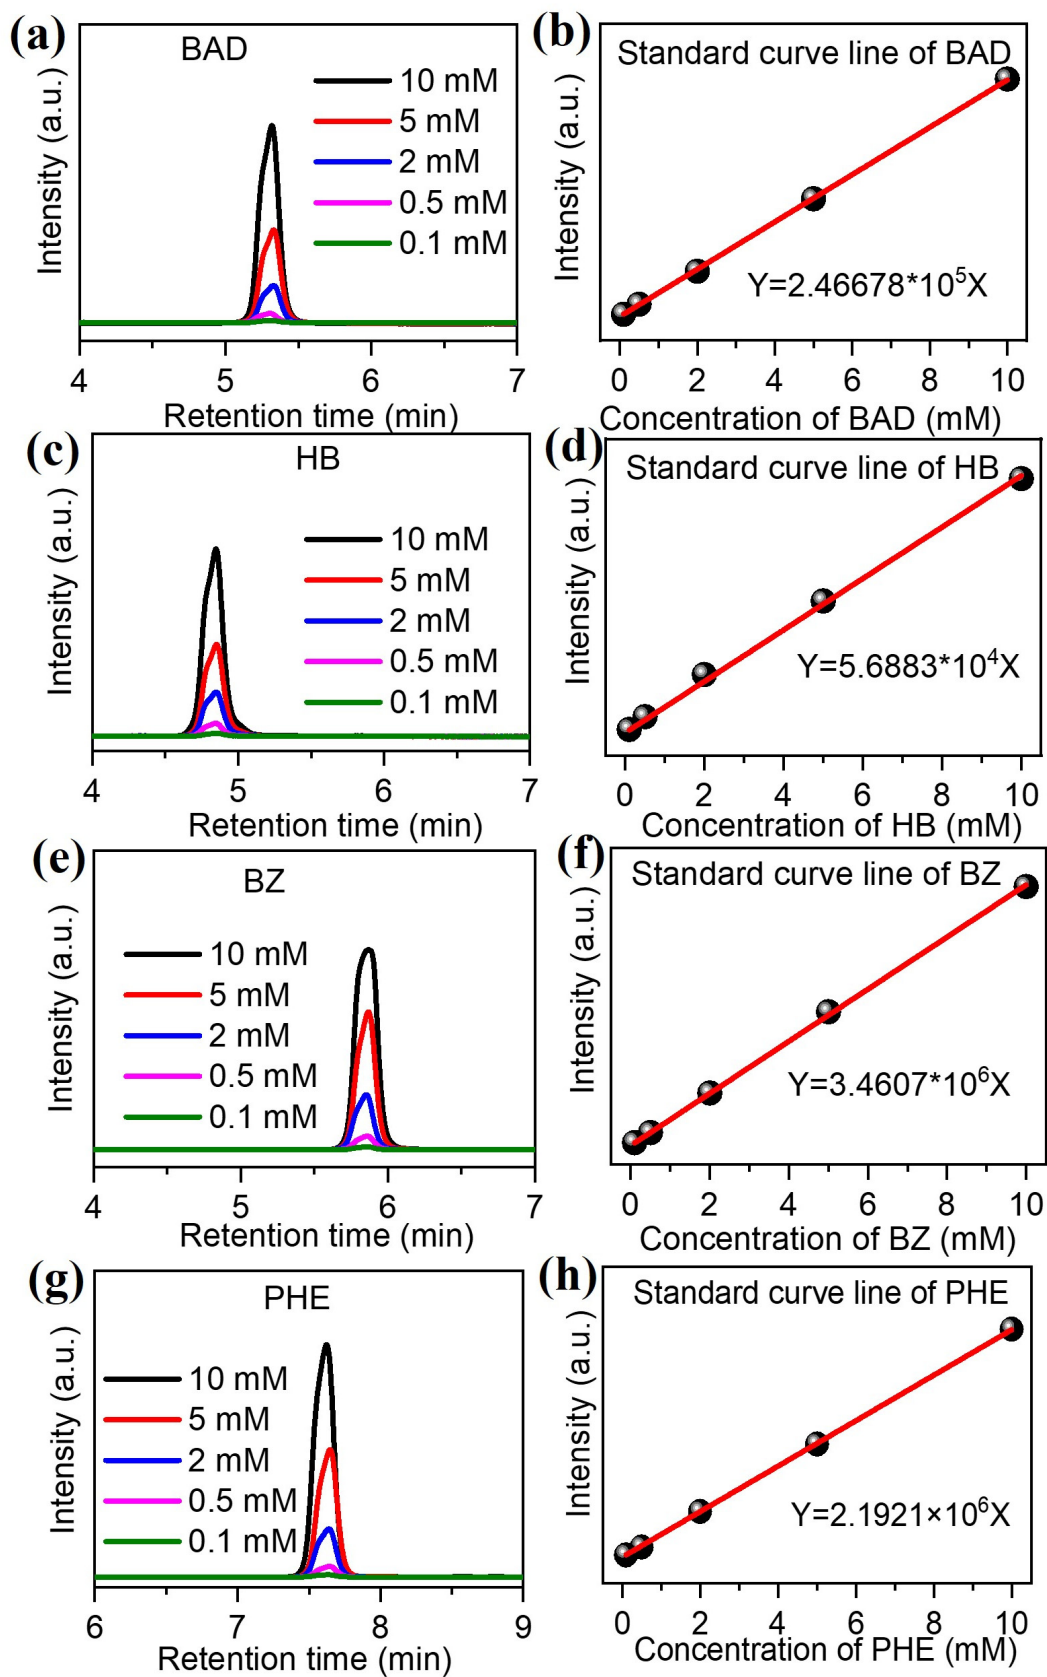

**Figure S4.** The HPLC spectra of (a) BAD, (c) HB, (d) BZ and (e) PHE; the corresponding standard curves of (b) BAD, (d) HB, (e) BZ and (h) PHE.

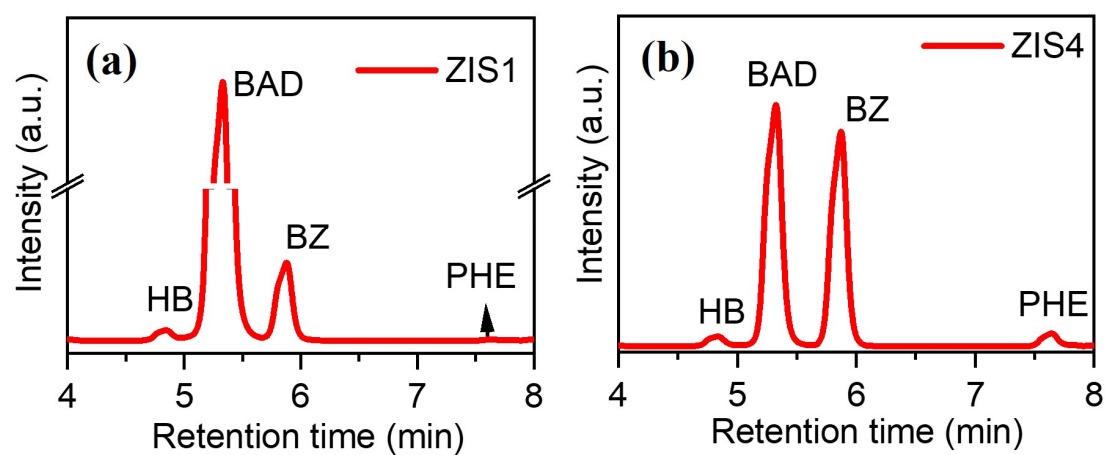

**Figure S5.** The HPLC spectra of products generated from (a) ZIS1 and (b) ZIS4.

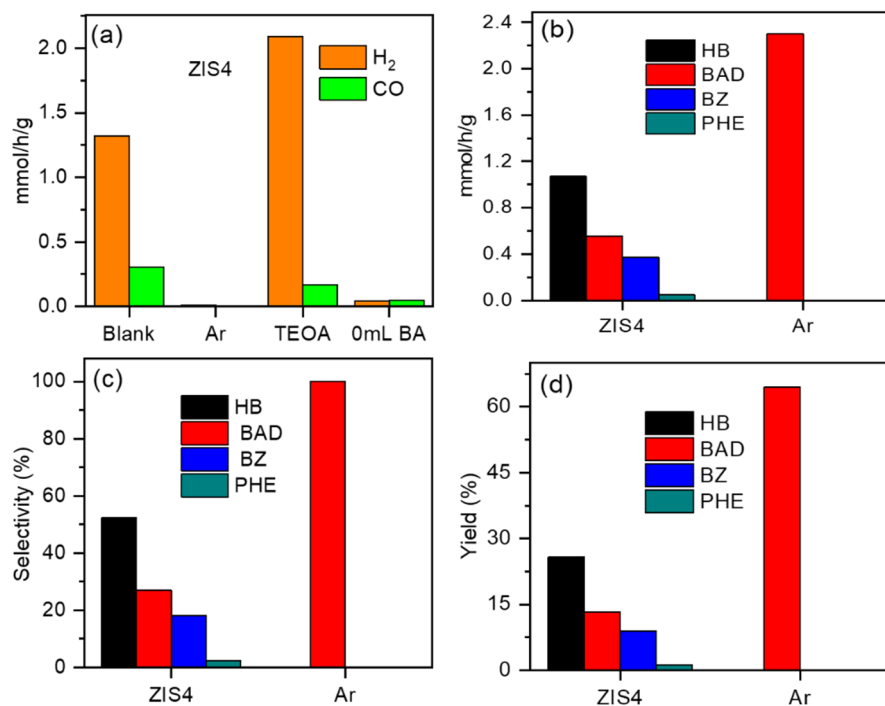

**Figure S6.** Controlling experiments over ZIS4 sample. (a) generation rate of  $H_2$  and CO, (b) generation rate, (c) selectivity and (d) yield of products form BA oxidation.

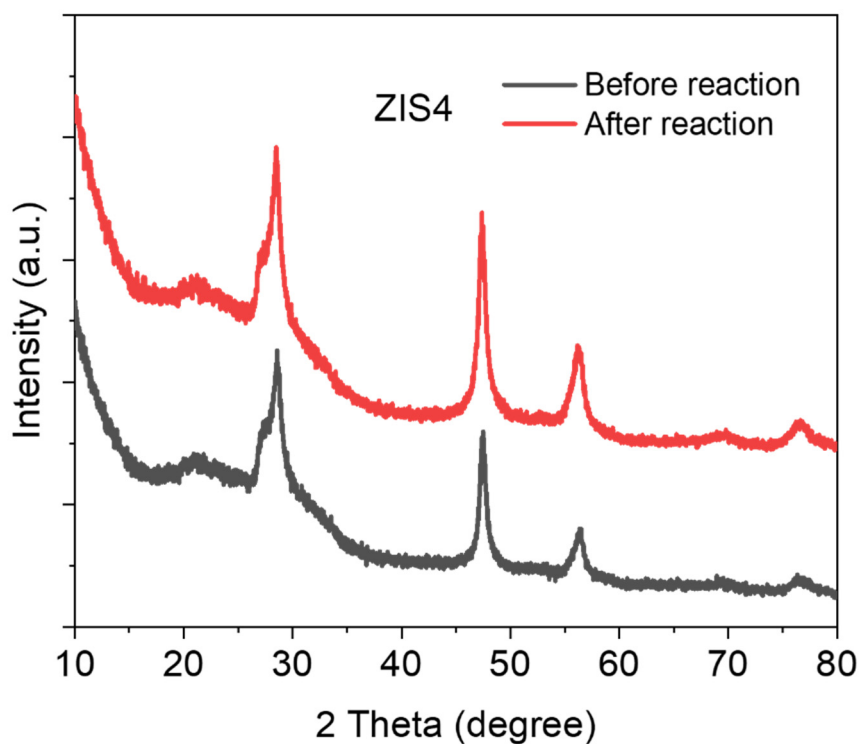

**Figure S7.** XRD patterns of ZIS4 before and after reaction.

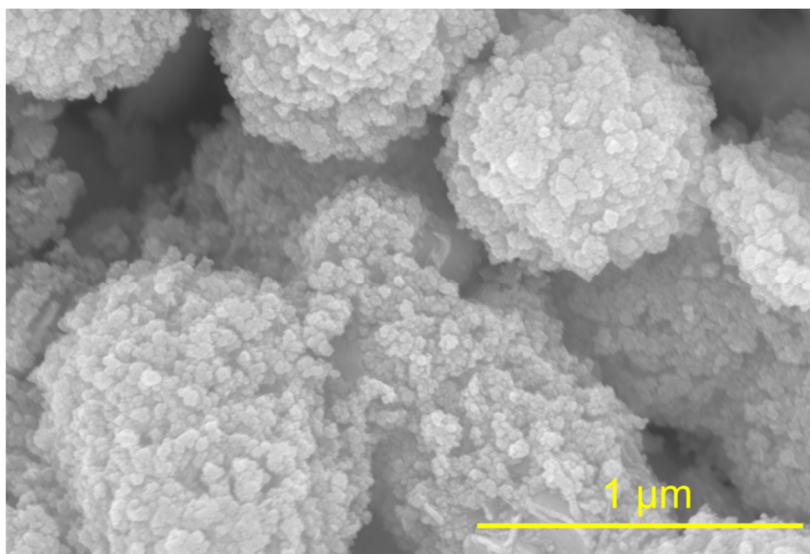

**Figure S8.** SEM image of ZIS4 after reaction.
